# Supplementary material
Source: PubMed Central journal article supplement (PMC11517820)

## A Junction Detection

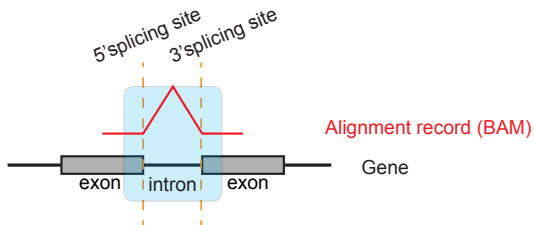

## B Intron Retention (single-end)

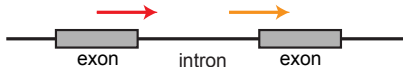

- Both intron-exon boundaries supported by >4 single-end reads

## Intron Retention (pair-end)

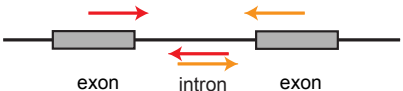

- Both intron-exon boundaries supported by >4 paired-end reads
- The mate reads for the above mentioned boundary reads should entirely lie entirely in the intron region

## C

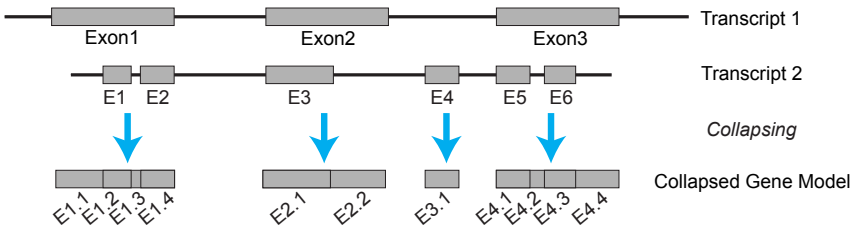

Supplement: NIHMS2026803-supplement-Supplemental_Figure_1.pdf [file NIHMS2026803-supplement-Supplemental_Figure_1.pdf]
