# Supplementary material
Source: PubMed Central journal article supplement (PMC11517820)
Supplement: NIHMS2026803-supplement-Supplemental_Figure_3.pdf [file NIHMS2026803-supplement-Supplemental_Figure_3.pdf]

### Supplementary Figure 3

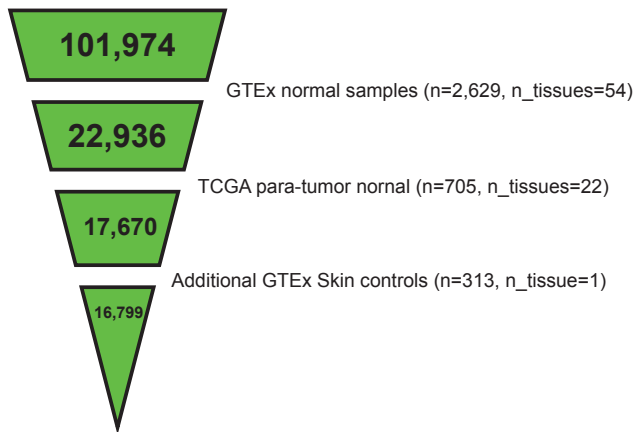

**Supplementary Figure 3. Inclusion of additional normal databases increases the specificity of retained junctions.** Number of retained junctions for distinct SNAF tumor specific control database filters, including the addition of TCGA control tissue samples..
