# Supplementary material
Source: PubMed Central journal article supplement (PMC11517820)
Supplement: NIHMS2026803-supplement-Supplemental_Figure_5.pdf [file NIHMS2026803-supplement-Supplemental_Figure_5.pdf]

## Supplementary Figure 5

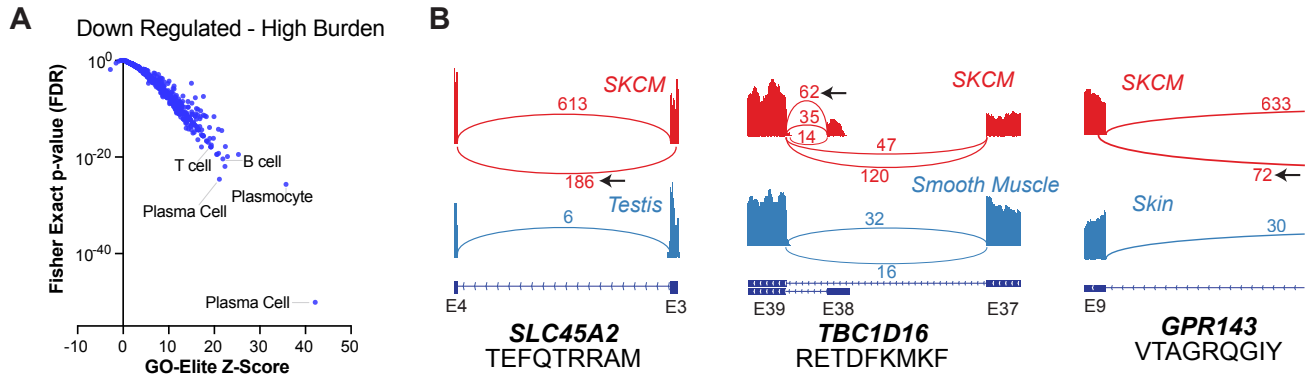

**Supplementary Figure 5. Poor survival-associated splicing-neoantigens in Melanoma.** A) Gene-set enrichment plot of low-neoantigen associated cell-type specific marker genes in TCGA-SKCM (fold>1.5 and empirical Bayes t-test  $p < 0.05$ , FDR corrected) in the software GO-Elite. B) SashimiPlot visualization of shared splicing neoantigen associated exon-exon junctions in an exemplar TCGA-SKCM and highly expressed control tissues (ArrayExpress accession: E-MTAB-2836). Exon IDs are derived from AltAnalyze. Curved lines indicated exon-exon junctions with associated read counts in a representative sample. The arrow denotes the splicing-neoantigen parental junction (unique to tumor samples).
