# Supplementary material
Source: PubMed Central journal article supplement (PMC11517820)
Supplement: NIHMS2026803-supplement-Supplemental_Figure_6.pdf [file NIHMS2026803-supplement-Supplemental_Figure_6.pdf]

## Supplementary Figure 6

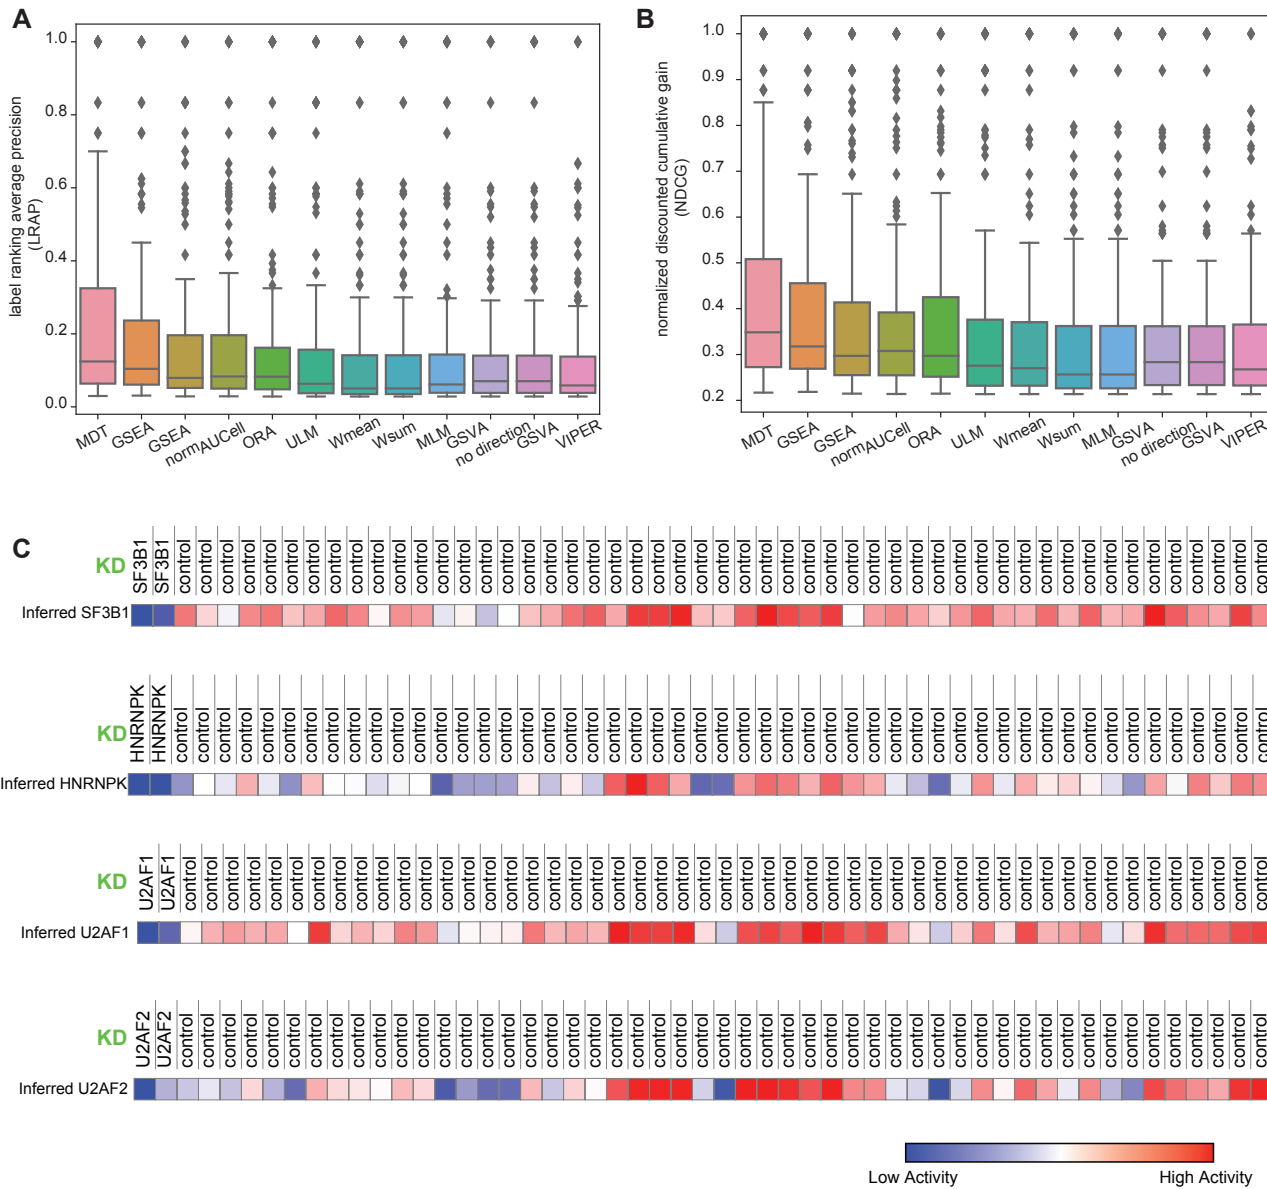

**Supplementary Figure 6. Benchmarking of prior TF activity methods for RBP activity inference.** A) Label Ranking Average Precision (LRAP) of 12 evaluated methods for splicing factor activity inference in HepG2 cells. B) Normalized Discounted Cumulative Gain (NDCG) of the 12 evaluated methods. C) Comparison of inferred splicing factor activity in cancer implicated splicing factors for RBP knockdown and controls. Source data in Data S10.
