# Supplementary material
Source: PubMed Central journal article supplement (PMC11517820)
Supplement: NIHMS2026803-supplement-Supplemental_Figure_7.pdf [file NIHMS2026803-supplement-Supplemental_Figure_7.pdf]

## Supplementary Figure 7

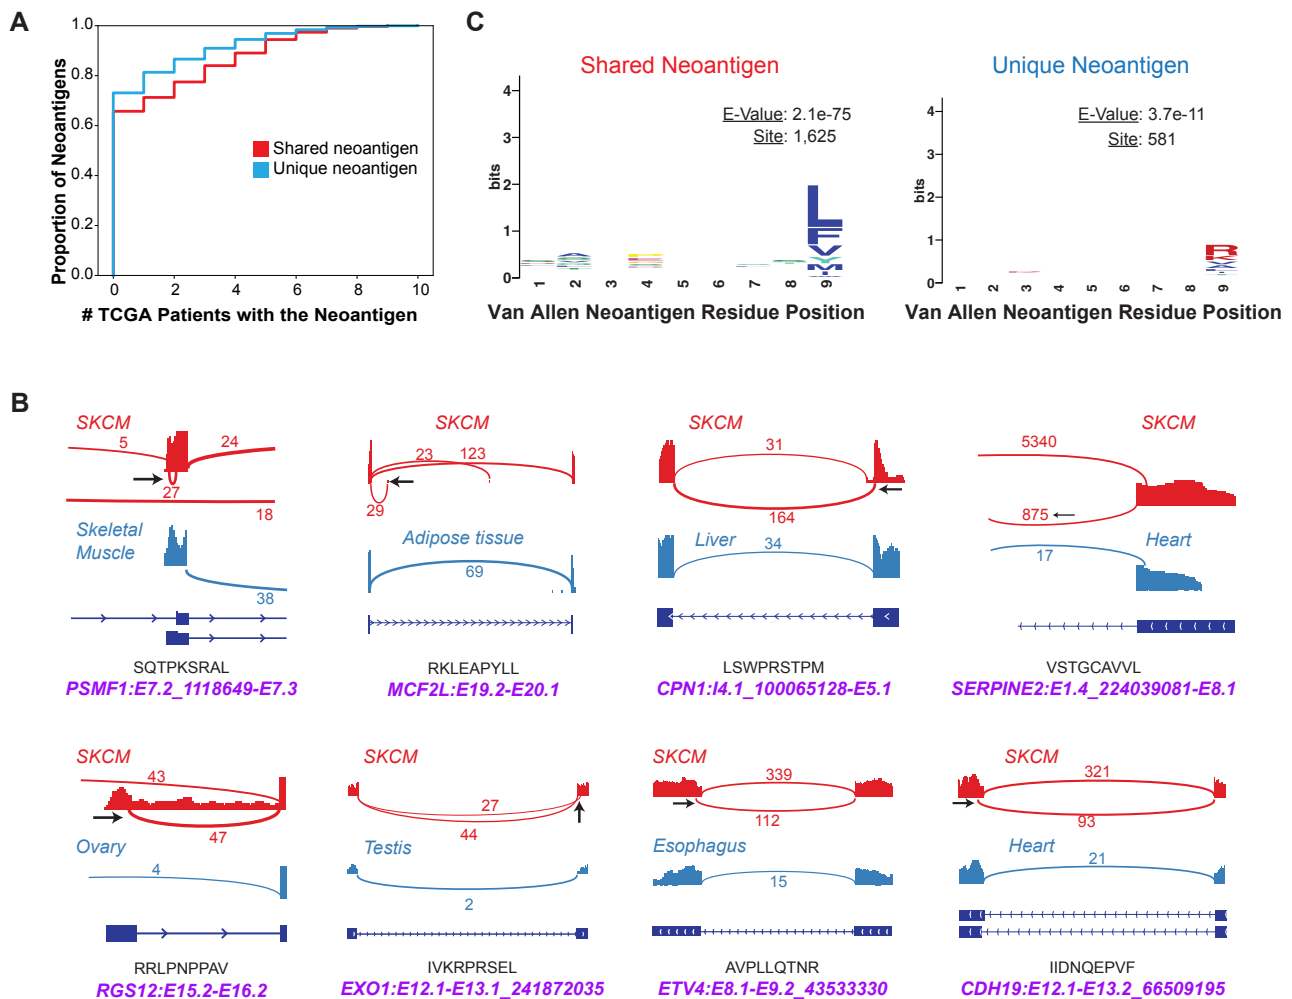

### Supplementary Figure 7. Shared splicing-neoantigens evidenced by immunopeptidomics.

A) Empirical Cumulative Distribution Function (ECDF) plot of occurrence of shared (red) versus unique (blue) splice neoantigens predicted from TCGA-SKCM. B) Example SashimiPlots of shared splicing-neoantigens (present in >15% of patient samples). The specificity of each neoantigen to SKCM tumors is illustrated relative to a selected non-tumor tissue sample. C) Distinct enriched amino acid motifs (MEME), comparing shared versus unique neoantigens in the Van Allen cohort.
