# Supplementary material
Source: PubMed Central journal article supplement (PMC11517820)
Supplement: NIHMS2026803-supplement-Supplemental_Figure_8.pdf [file NIHMS2026803-supplement-Supplemental_Figure_8.pdf]

## Supplementary Figure 8

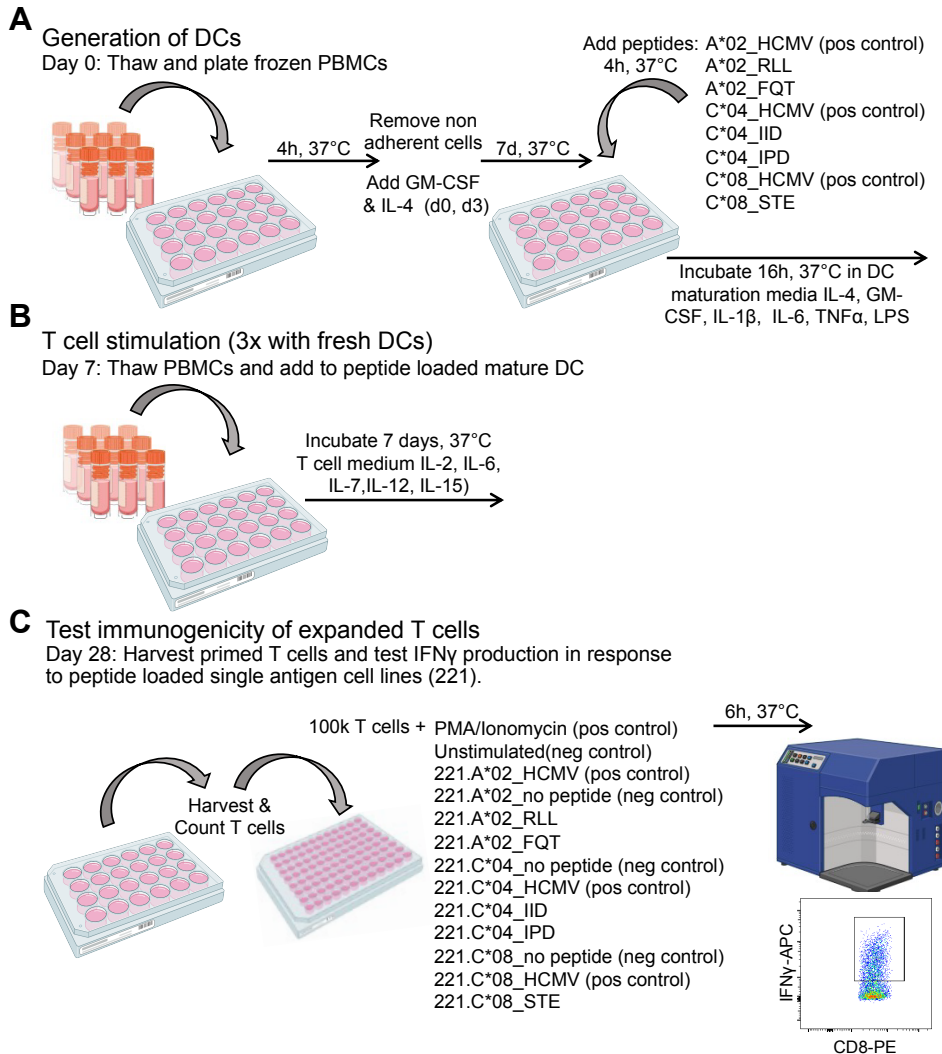

**Supplementary Figure 8. T-cell immunogenicity analyses.** Schematic depiction of the experimental design to A) Generate dendritic cells (DCs) from healthy donor blood PBMCs; B) Prime T cells using peptide loaded DCs; and C) Evaluation of immunogenicity by measurement of IFN $\gamma$  production in response 221 cells selectively expressing the indicated HLA allele. CD8<sup>+</sup> T-cell priming by IFN $\gamma$  production was tested for 5 melanoma shared splicing antigens and compared to negative (unstimulated, no pep) or positive (PMA/I, FLU, HCMV) controls. Experimental design adapted from Rivero-Hinojosa et al. 2021 and Meriotti et al. 2023.
