# Supplementary material
Source: PubMed Central journal article supplement (PMC11517820)

# Supplementary Figure 11

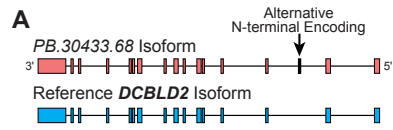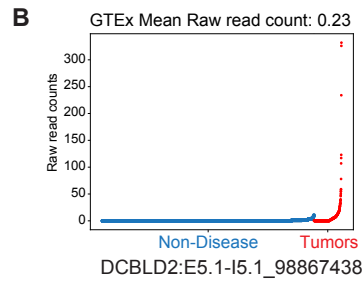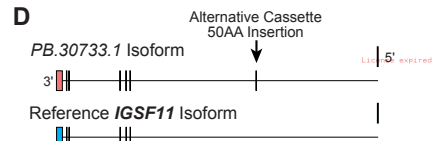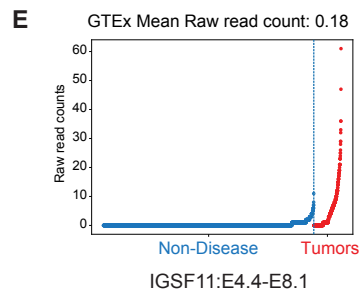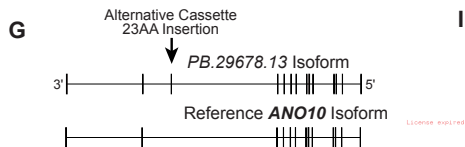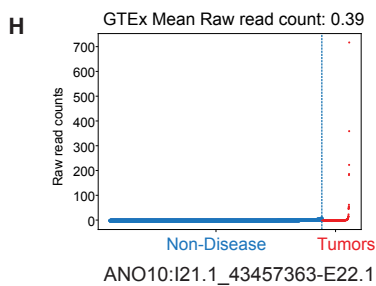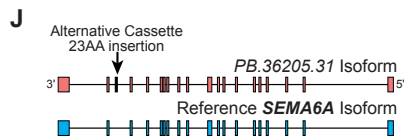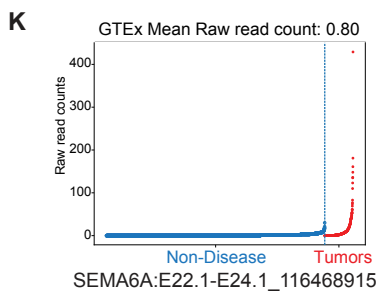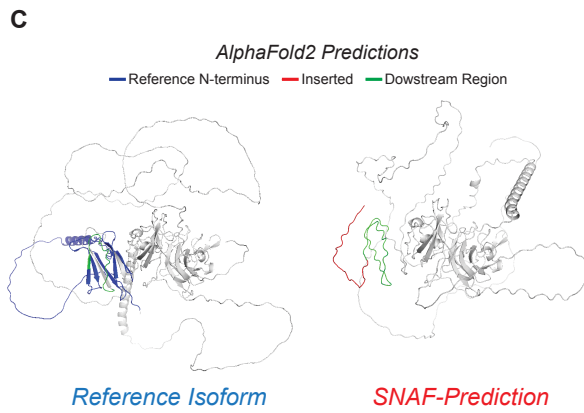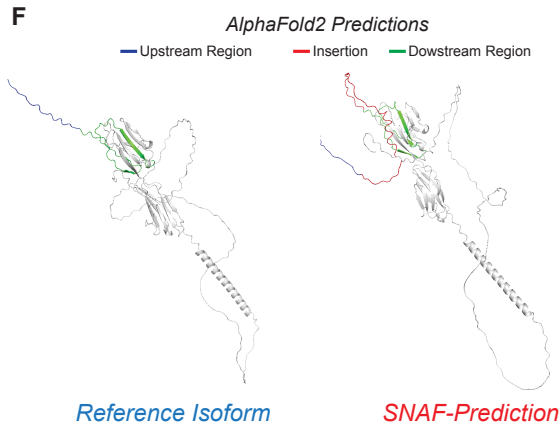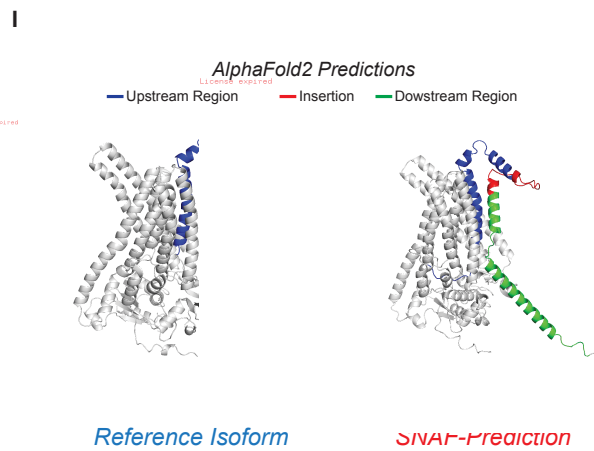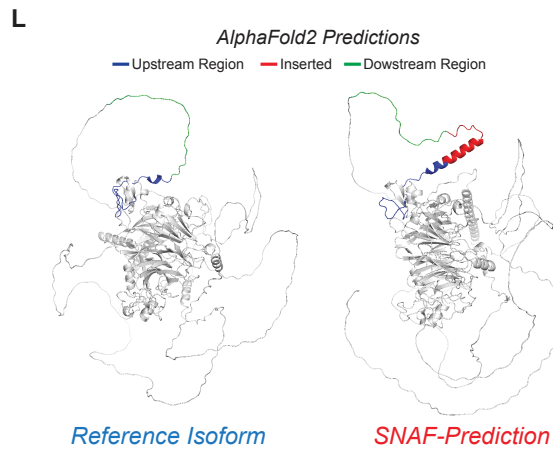

Supplement: NIHMS2026803-supplement-Supplemental_Figure_11.pdf [file NIHMS2026803-supplement-Supplemental_Figure_11.pdf]

# Supplementary Figure 12

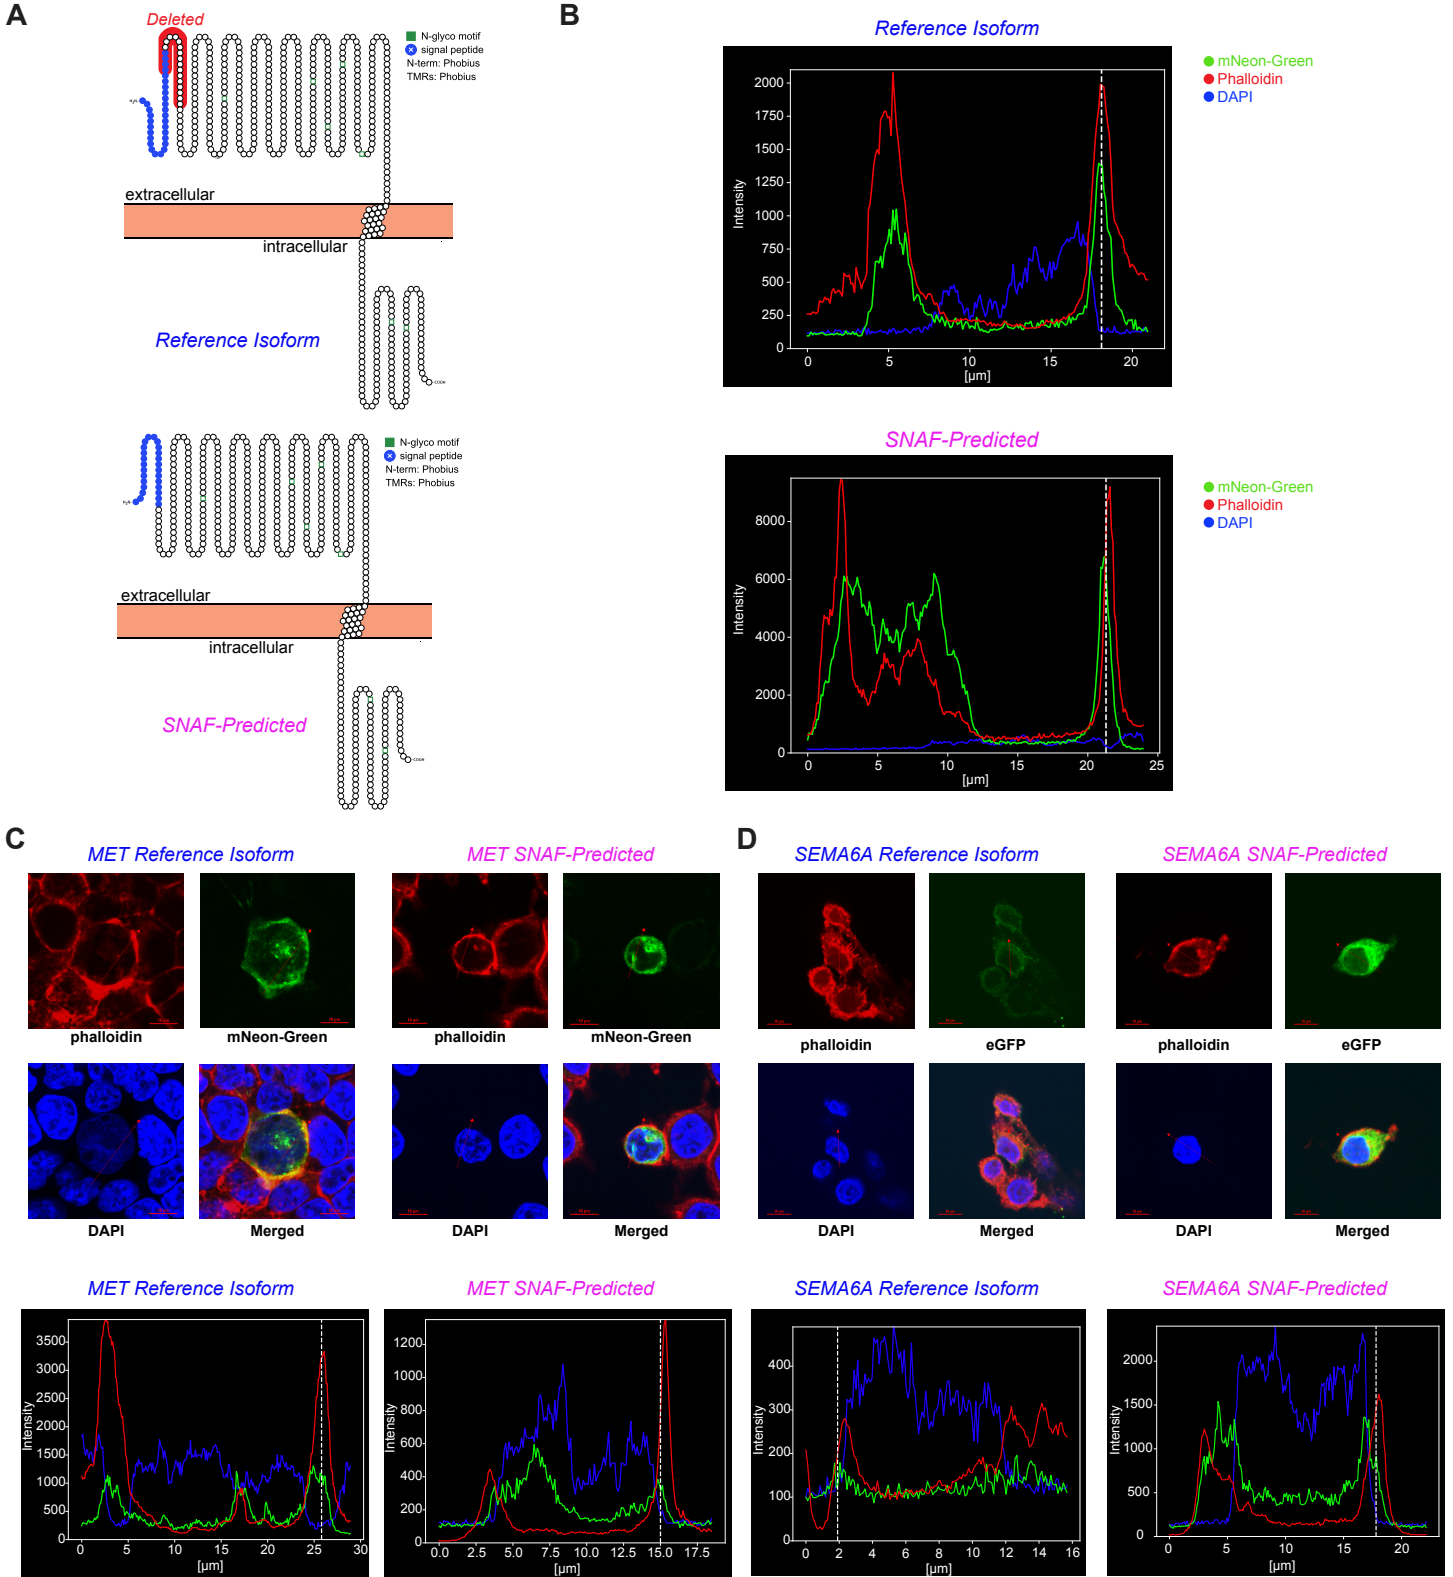

Supplement: NIHMS2026803-supplement-Supplemental_Figure_12.pdf [file NIHMS2026803-supplement-Supplemental_Figure_12.pdf]

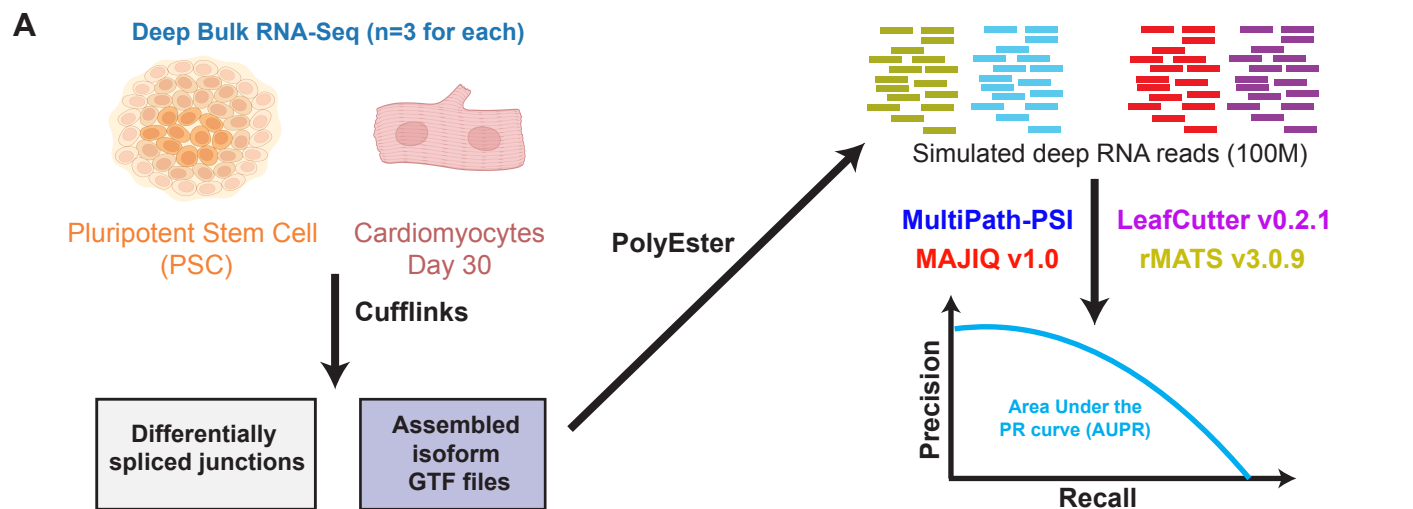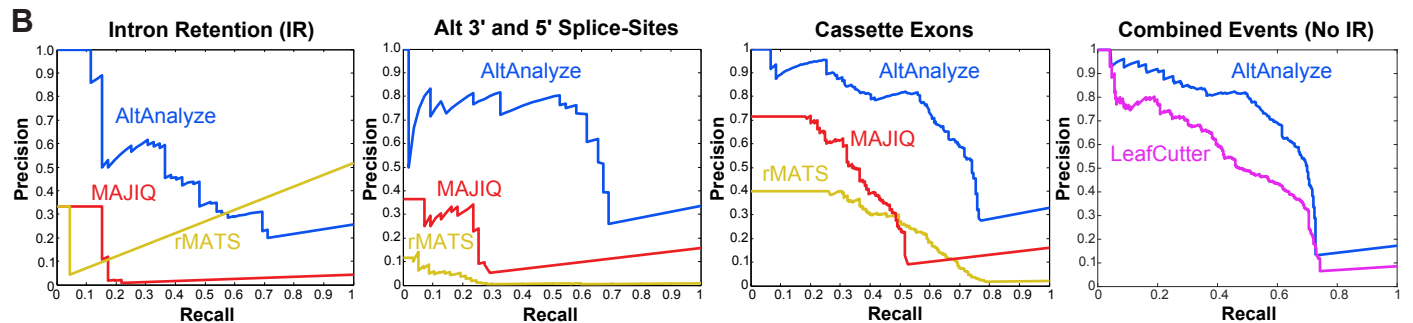

Supplement: NIHMS2026803-supplement-Supplemental_Figure_2.pdf [file NIHMS2026803-supplement-Supplemental_Figure_2.pdf]

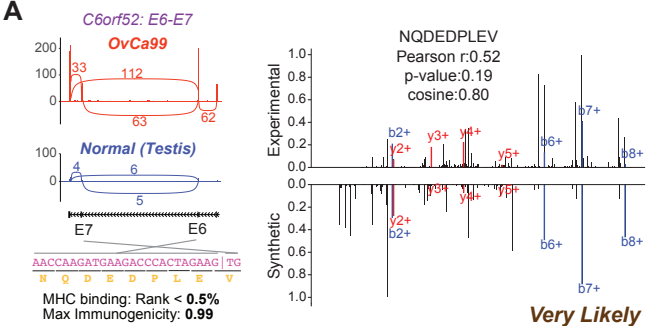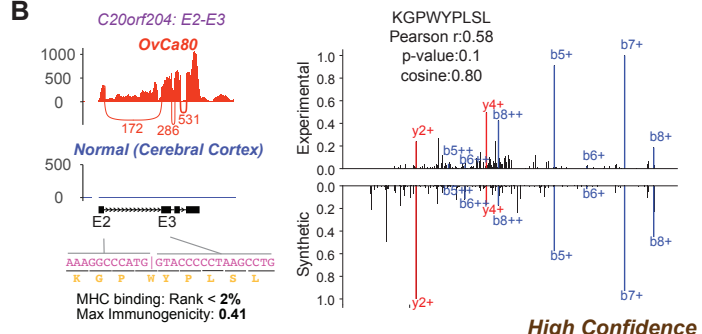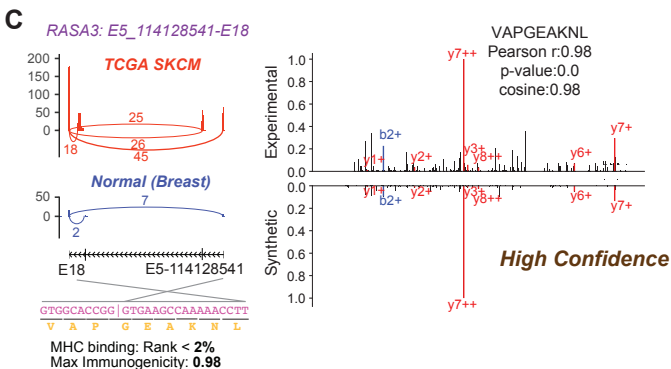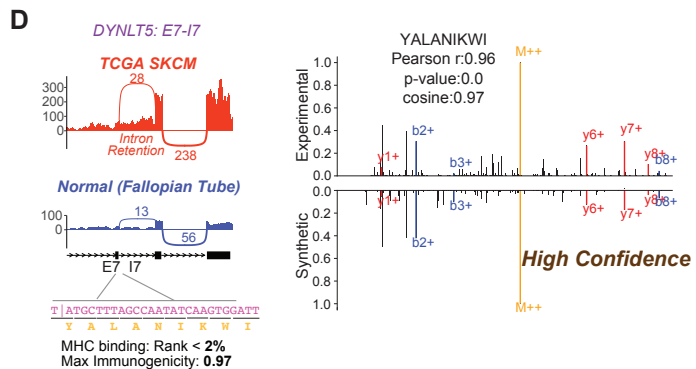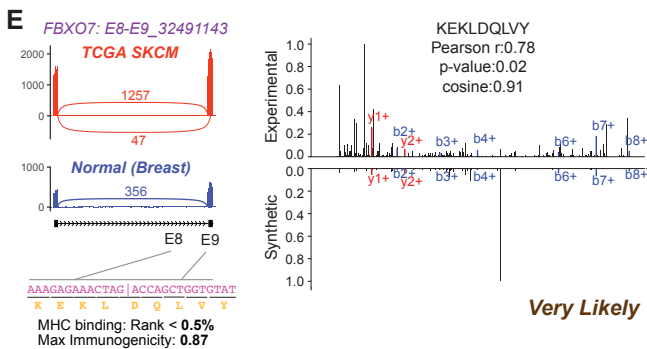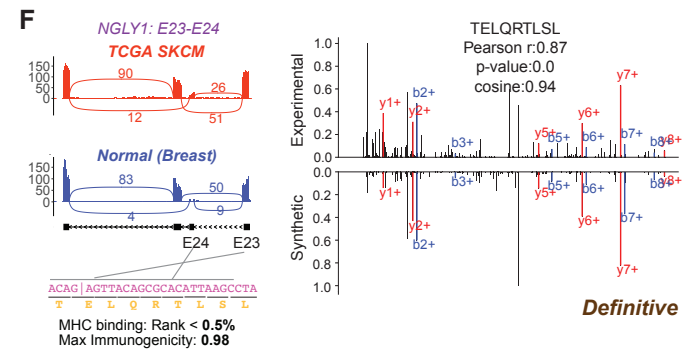

Supplement: NIHMS2026803-supplement-Supplemental_Figure_4.pdf [file NIHMS2026803-supplement-Supplemental_Figure_4.pdf]

**A**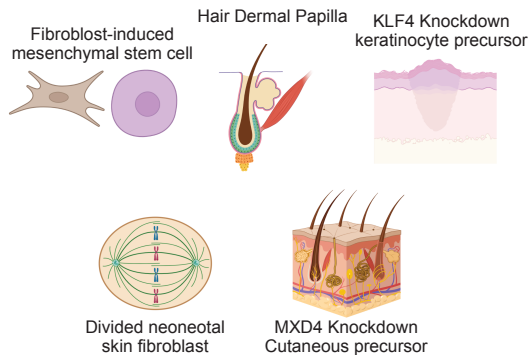**B**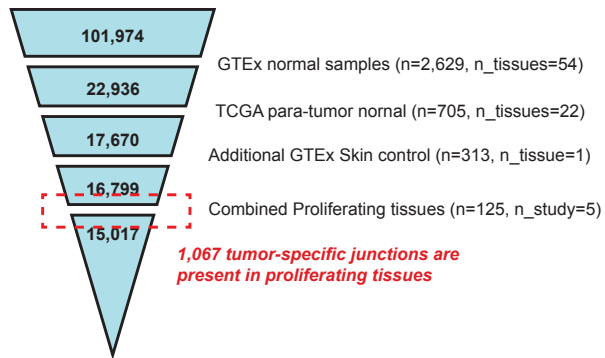**C**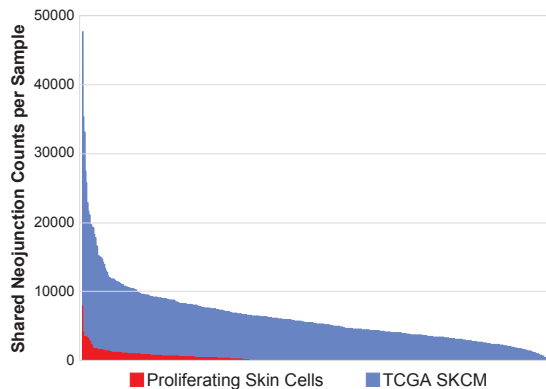**D**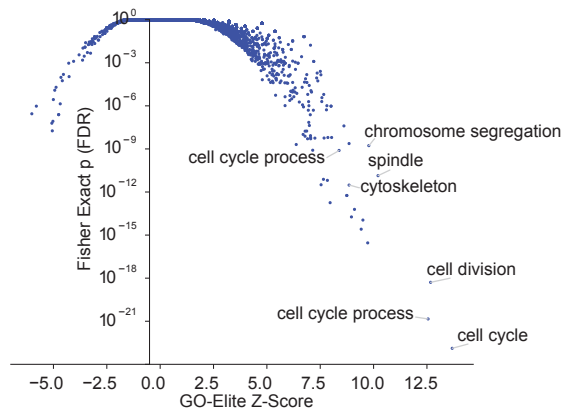

Supplement: NIHMS2026803-supplement-Supplemental_Figure_9.pdf [file NIHMS2026803-supplement-Supplemental_Figure_9.pdf]
